# Supplementary material
Source: PubMed Central journal article supplement (PMC8503811)
Supplement: Supplementary_Data.pdf [file Supplementary_Data.pdf]

Figure S1. Schematic representation of the study design. Study 1, exosomal miRNA profiles were compared between the patients with pCR (n=12) and non-pCR (n=12). Study 2, exosomal miRNA profiles were compared between the non-pCR patients with breast cancer recurrence (n=8) and no recurrence (n=8). miRNA/miR, microRNA; pCR, pathological complete response; ER, estrogen receptor; HER2, human epidermal growth factor receptor 2; PR, progesterone receptor; TN, triple negative.

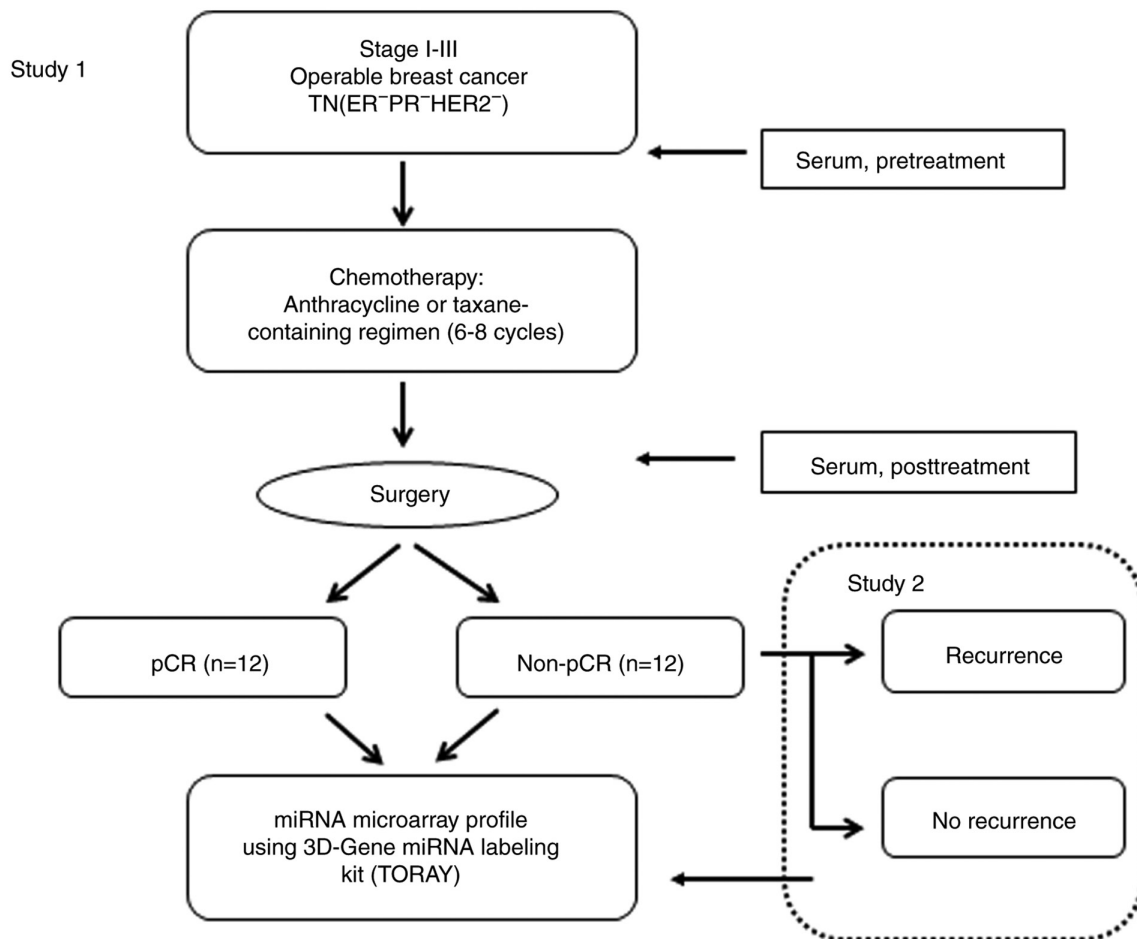

Figure S2. ROC curve analysis of the combined signature four miRNAs predicting pathological complete response. The four miRNAs included miR-4448, miR-2392, miR-2467-3p and miR-4800-3p. AUC, 0.7652. ROS, receiver operating characteristics; miRNA/miR, microRNA; AUC, area under the curve.

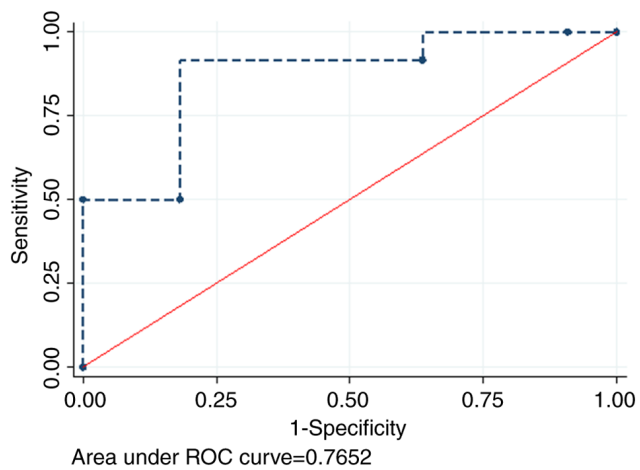

Table SI. Clinical characteristics before chemotherapy in patients with non-pCR.

| Clinical characteristics                       | Patients with breast cancer recurrence (n=8) | Patients without breast cancer recurrence (n=8) | P-value |
|------------------------------------------------|----------------------------------------------|-------------------------------------------------|---------|
| Median age at diagnosis, median (range)        | 52 (35-74)                                   | 62 (37-68)                                      | 0.29    |
| Menopausal status, n (%)                       |                                              |                                                 | 0.25    |
| Premenopausal                                  | 3 (37)                                       | 1 (13)                                          |         |
| Postmenopausal                                 | 5 (63)                                       | 7 (87)                                          |         |
| Tumor size, cm, median (range)                 | 4.2 (1.5-10.0)                               | 2.4 (1.7-7.8)                                   | 0.61    |
| Nodal status, n (%)                            |                                              |                                                 | 0.28    |
| Negative                                       | 1 (13)                                       | 4 (50)                                          |         |
| Positive                                       | 7 (87)                                       | 4 (50)                                          |         |
| Clinical T                                     |                                              |                                                 | 0.55    |
| T1                                             | 2 (25)                                       | 3 (38)                                          |         |
| T2                                             | 2 (25)                                       | 4 (50)                                          |         |
| T3                                             | 1 (13)                                       | 0 (0)                                           |         |
| T4                                             | 3 (38)                                       | 1 (12)                                          |         |
| Stage                                          |                                              |                                                 | 0.67    |
| 1                                              | 1 (13)                                       | 2 (25)                                          |         |
| 2                                              | 3 (38)                                       | 4 (50)                                          |         |
| 3                                              | 4 (50)                                       | 2 (25)                                          |         |
| Nuclear grade                                  |                                              |                                                 | 0.58    |
| 1,2                                            | 2 (25)                                       | 3 (38)                                          |         |
| 3                                              | 6 (75)                                       | 5 (62)                                          |         |
| Ki67 labeling index, %, median (range)         | 88 (20-100)                                  | 60 (30-78)                                      | 0.06    |
| NAC, n (%)                                     |                                              |                                                 | 1.00    |
| FEC followed by DOC                            | 5 (63)                                       | 5 (63)                                          |         |
| PAC followed by FEC                            | 2 (25)                                       | 3 (38)                                          |         |
| FEC                                            | 1 (13)                                       | 0 (0)                                           |         |
| Median follow-up period, month, median (range) | 36 (17-57)                                   | 81 (65-121)                                     |         |

miRNA/miR, microRNA; pCR, pathological complete response; NAC, neo-adjuvant chemotherapy; FEC, 5-fluorouracil, epirubicin and cyclophosphamide; DOC, docetaxel; PAC, paclitaxel.

Table SII. Differentially expressed exosomal miRNAs related to the patients with recurrence (>2-fold-change).

| A, Upregulated miRNAs |             |         |
|-----------------------|-------------|---------|
| Mature ID             | Fold-change | P-value |
| hsa-miR-195-5p        | 4.43        | 0.020   |
| hsa-miR-31-5p         | 4.40        | 0.002   |
| hsa-let-7f-5p         | 3.51        | 0.020   |
| hsa-miR-5584-5p       | 3.32        | 0.002   |
| hsa-miR-130a-3p       | 3.20        | 0.030   |
| hsa-miR-4421          | 2.95        | 0.002   |
| hsa-miR-16-5p         | 2.81        | 0.040   |
| hsa-miR-106b-5p       | 2.77        | 0.030   |
| hsa-let-7g-5p         | 2.73        | 0.040   |
| hsa-miR-3120-3p       | 2.71        | 0.008   |
| hsa-miR-378b          | 2.38        | 0.040   |
| hsa-miR-515-3p        | 2.35        | 0.020   |
| hsa-miR-525-3p        | 2.24        | 0.020   |
| hsa-miR-7515          | 2.08        | 0.020   |
| hsa-miR-409-5p        | 2.07        | 0.020   |

| B, Downregulated miRNAs |             |          |
|-------------------------|-------------|----------|
| Mature ID               | Fold-change | P-values |
| hsa-miR-548ab           | 0.23        | <0.001   |
| hsa-miR-6751-3p         | 0.24        | <0.001   |
| hsa-miR-4732-3p         | 0.26        | 0.004    |
| hsa-miR-6857-3p         | 0.30        | 0.003    |
| hsa-miR-487a-5p         | 0.30        | 0.020    |
| hsa-miR-769-3p          | 0.30        | 0.030    |
| hsa-miR-133a-3p         | 0.32        | 0.004    |
| hsa-miR-6783-3p         | 0.33        | 0.040    |
| hsa-miR-3943            | 0.35        | 0.030    |
| hsa-miR-3617-3p         | 0.36        | 0.040    |
| hsa-miR-887-5p          | 0.36        | 0.040    |
| hsa-miR-3190-5p         | 0.37        | 0.020    |
| hsa-miR-5685            | 0.37        | 0.040    |
| hsa-miR-5004-5p         | 0.37        | 0.047    |
| hsa-miR-92a-2-5p        | 0.37        | 0.004    |
| hsa-miR-1287-5p         | 0.38        | 0.030    |
| hsa-miR-466             | 0.38        | 0.040    |
| hsa-miR-4708-5p         | 0.38        | 0.047    |
| hsa-miR-340-3p          | 0.38        | 0.008    |
| hsa-miR-6701            | 0.38        | 0.040    |
| hsa-miR-4761-3p         | 0.39        | 0.010    |
| hsa-miR-4290            | 0.43        | 0.020    |
| hsa-miR-7848-3p         | 0.45        | 0.040    |
| hsa-miR-566             | 0.46        | 0.030    |
| hsa-miR-4446-5p         | 0.47        | 0.030    |
| hsa-miR-4730            | 0.48        | 0.002    |
| hsa-miR-34b-3p          | 0.48        | 0.030    |
| hsa-miR-5196-3p         | 0.49        | 0.040    |

Only the miRNAs with statistically significant P-values are shown.  
miRNA/miR, microRNA.

Table III. Top 20 KEGG pathways among the 43 miRNAs related to the patients with non-pCR and breast cancer recurrence.

| KEGG pathway                                  | P-value | Number of genes | Number of miRNAs |
|-----------------------------------------------|---------|-----------------|------------------|
| 'Pathways in cancer'                          | <0.0001 | 205             | 16               |
| 'Epstein-Barr virus infection'                | 0.0006  | 108             | 16               |
| 'Focal adhesion'                              | 0.0080  | 104             | 16               |
| 'Proteoglycans in cancer'                     | <0.0001 | 118             | 15               |
| 'Protein processing in endoplasmic reticulum' | <0.0001 | 110             | 15               |
| 'Viral carcinogenesis'                        | <0.0001 | 117             | 15               |
| 'Cell cycle'                                  | <0.0001 | 80              | 15               |
| 'Hippo signaling pathway'                     | <0.0001 | 81              | 15               |
| 'Oocyte meiosis'                              | <0.0001 | 64              | 15               |
| 'Ubiquitin mediated proteolysis'              | <0.0001 | 80              | 15               |
| 'MAPK signaling pathway'                      | 0.0206  | 118             | 15               |
| 'Renal cell carcinoma'                        | <0.0001 | 44              | 14               |
| 'RNA transport'                               | <0.0001 | 93              | 14               |
| 'Bacterial invasion of epithelial cells'      | 0.0002  | 46              | 14               |
| 'mTOR signaling pathway'                      | 0.0002  | 40              | 14               |
| 'Sphingolipid signaling pathway'              | 0.0003  | 67              | 14               |
| 'Endocytosis'                                 | 0.0004  | 109             | 14               |
| 'HIF-1 signaling pathway'                     | 0.0050  | 59              | 14               |
| 'Spliceosome'                                 | 0.0119  | 68              | 14               |
| 'Transcriptional misregulation in cancer'     | 0.0206  | 86              | 14               |

KEGG, Kyoto Encyclopedia of Genes and Genomes; miRNA/miR, microRNA; pCR, pathological complete response.

Table SIV. Target genes regulated by two miRNAs observed in the patients with non-pCR (Recurrence vs. no recurrence).

| Target genes  | miRNAs                               |
|---------------|--------------------------------------|
| <i>APP</i>    | hsa-miR-130a-3p, hsa-miR-106b-5p     |
| <i>ARL2</i>   | hsa-miR-195-5p, hsa-miR-16-5p        |
| <i>ARPC5</i>  | hsa-miR-133a-3p, has-miR-31-5p       |
| <i>BCL2L1</i> | has-miR-let-7g-5p, hsa-miR-133a-3p   |
| <i>BIRC5</i>  | hsa-miR-195-5p, hsa-miR-16-5p        |
| <i>BMI1</i>   | hsa-miR-16-5p, has-miR-let-7g-5p     |
| <i>CCND3</i>  | hsa-miR-195-5p, hsa-miR-16-5p        |
| <i>CCNE1</i>  | hsa-miR-195-5p, hsa-miR-16-5p        |
| <i>CDC42</i>  | hsa-miR-195-5p, hsa-miR-133a-3p      |
| <i>CDK4</i>   | hsa-miR-195-5p, hsa-miR-34b-3p       |
| <i>CDKN1A</i> | hsa-miR-515-3p, hsa-miR-106b-5p      |
| <i>CHUK</i>   | hsa-miR-195-5p, hsa-16-5p            |
| <i>DICER1</i> | hsa-miR-130a-3p, hsa-miR-195-5p      |
| <i>E2F3</i>   | hsa-miR-106b-5p, hsa-miR-195-5p      |
| <i>EGFR</i>   | hsa-miR-16-5p, hsa-miR-133a-3p       |
| <i>GALNT7</i> | hsa-miR-34b-3p, hsa-miR-16-5p        |
| <i>HMGA2</i>  | hsa-miR-16-5p, has-miR-let-7g-5p     |
| <i>IGF1R</i>  | hsa-miR-16-5p, hsa-miR-133a-3p       |
| <i>IL13</i>   | has-miR-let-7g-5p, has-miR-let-7f-5p |
| <i>KRAS</i>   | hsa-miR-16-5p, has-miR-let-7g-5p     |
| <i>MYB</i>    | hsa-miR-195-5p, hsa-miR-16-5p        |
| <i>MYC</i>    | has-miR-let-7g-5p, hsa-miR-34b-3p    |
| <i>RAF1</i>   | hsa-miR-195-5p, hsa-miR-16-5p        |
| <i>RET</i>    | hsa-miR-195-5p, has-miR-31-5p        |
| <i>PURA</i>   | hsa-miR-106b-5p, hsa-miR-16-5p       |
| <i>RUNX3</i>  | hsa-miR-130a-3p, hsa-miR-106b-5p     |
| <i>YY1</i>    | hsa-miR-34b-3p, has-miR-31-5p        |

miRNA/miR, microRNA; pCR, pathological complete response.
